# Supplementary material for: Synoptic perspectives on pollutant transport patterns observed by satellites over East Asia: Case studies with a conceptual model
Source: Copernicus journal article supplement (doi:10.5194/acp-2016-673), 2016-09-09
Supplement: Supplementary file [file acp-2016-673-AC1-supplement.pdf]

## Authors' response to the review comments

### “Synoptic perspectives on pollutant transport patterns observed by satellites over East Asia: Case studies with a conceptual model” by Kim et al.

#### General responses

The authors express their appreciation to the two reviewers and the editor. We believe that their comments are very productive and substantially contributed to improving the manuscript. We offer general responses and point-by-point responses to the issues and comments addressed by reviewers. Reviewers' comments are shown in italics.

Here are responses for main comments.

#### (1) Lack of quantitative analysis (Reviewer 1 & 2)

We do understand the reviewers' concern that current manuscript is lack of numerical quantification. It may be our fault because we tried to separate the conceptual approach and numerical approach in current manuscript and concurrent/following studies. In strong agreement with reviewer's comments, we have included more complete model performance evaluations to make this manuscript a standalone research, but also tried to stay in the original scope of the study.

Here are the list of major changes in the manuscript

1. Main model simulations are replaced to the NOAA FNL meteorology-initiated simulations. Both GFS-initiated and FNL-initiated simulations are analyzed.
2. Multiple emission inventories are tested in response to the reviewer's comment on the feasibility of old emission inventories. Two sets of combinations for international and South Korean emission inventories are utilized.
3. We expanded model performance evaluation with further detailed analyses. The additional analyses confirm that model simulations showed very good performance compared to surface observations in their spatial and temporal variation.

In addition, we like to clarify the scope of this study. This study hypothesizes a conceptual model to understand the correlation between regional pollution and synoptic meteorology. We designed this study to suggest control mechanisms of pollution's development and dissipation associated with synoptic systems (and visible evidences from satellites), so it can be further used to design climatological classification over longer term. However, we did not include numerical classification method itself in the current version of the study. Numerical classification, using the conceptual model suggested in this study, is an ongoing next step. As many researchers may agree, the issue of regional air quality in East Asia is very complicated, and we believe that proper classification should be based on conceptual understanding of underlying physics and chemistry.

We do not think that one study can solve all the questions of recent air quality issues in East Asia, especially on the puzzle why East Asia has experienced severe haze events during cold seasons in recent years even though there has been considerable reduction of anthropogenic emissions released from China. This study focuses on the role of synoptic weather among many necessary studies. Hopefully, this study provides a few missing links towards understanding regional air quality and meteorology.

(2) Use of satellite observation (Reviewer 2)

We do not agree that satellites are useless in monitoring regional air quality in East Asia. We understand and agree with the reviewer's concern on the limitation of satellite monitoring, but we also believe in the strong advantages of using satellite data for regional air quality monitoring. Over decades, numerous satellite products have helped monitoring regional pollutants and their precursors.

Satellite monitoring can be very useful because *it can evaluate model outputs and can constrain model inputs*. Satellite product is limited when it was used alone. However, satellite products can provide a good synergy when combined and interpreted with additional information. This study demonstrates the capability of an integrated system of satellite, model and weather analysis to advance understanding in regional air quality. We would not reject the use of satellite data due to its uncertainty.

(3) Scientific importance (Reviewer 2)

In recent years, frequent occurrence of severe haze events in East Asia is one of the most serious public concerns in this region. The reason for the increased haze events is still unknown and very puzzling. Since recent space-borne monitoring of Chinese anthropogenic emissions indicated a decreasing trends in NO<sub>x</sub> and SO<sub>2</sub> emissions (Duncan et al., 2016), the role of meteorology has getting more attention, as addressed in the manuscript and the studies mentioned by the reviewer #1. Our manuscript focuses on the possible role of meteorology, especially by the routine passages of synoptic systems, on the formation and removal of regional pollutions in East Asia. This manuscript addresses the importance and governing characteristics of meteorology in the air quality of East Asia.

Duncan et al., 2016: A space-based, high-resolution view of notable changes in urban NO<sub>x</sub> pollution around the world, doi:10.1002/2015JD024121

We also provide specific responses below.

**Anonymous Referee #2**

***General comments: As the authors have already acknowledged in the summary and conclusions section, this manuscript lacks of (if not none) quantitative analyses and provides no conclusive findings. There are a lot of jumps between reasoning steps in statements throughout the manuscript with no solid supporting evidence present. In fact, most part of the analyses are descriptive and subjective. There are many validated scientific tools out there but none of them are used here. Further, the entire manuscript is just a display of all kinds of "observations" assembled, with no scientific validation of the datasets used and no uncertainty checks on them. It is not convincing to the reviewer that the manuscript in its current shape can be an independent scientific paper.***

Thanks for the comment. We apologize that we did not provide more specific the model evaluation previously. We provide more detailed model evaluation in the new manuscript. For example, Figure R1 & R2 show comparison of surface PM<sub>10</sub>, ozone and NO<sub>2</sub> concentrations during November 2013. Monthly comparisons during all study period are included in the supplementary material.

We do not agree that this study provides no conclusive findings. In fact, our study addresses very important implication to understand the discrepancies between decreased anthropogenic emissions and increased severe haze events in the East Asian countries. As described in the conclusion, synoptic weather systems in this region are likely one of the main mechanisms to control the accumulation (with high pressure systems) and dissipation (by cyclones) of pollutants. Actually, this finding is connected to our next study (Kim et al., 2017c) that demonstrates that recent increase of surface particulate matter concentration in South Korea is fully explained by the interannual variation of surface wind speed, so the strength of midlatitude ventilation plays a crucial role in regional air quality in East Asia (See Figure R3). This implies that the role of synoptic weather system in East Asia is as large as the rapid change of anthropogenic emissions. We believe current study provides very important link to connect this region's air quality to changes of meteorology and/or climate.

***However, the datasets and the plots the manuscript collected/produced can be useful supporting material for advanced quantitative analyses.***

Thanks for the comment. We hope this study helps other quantitative studies by linking short-term modeling and observations to long-term climate statistics. We do respect values of quantitative statistics of long-term analysis, but also believe that the short-term and in situ observations should not be ignored. For example, the shallow band-shaped plumes, described in the manuscript, were rarely identified in the monthly time scale. In daily satellite observations, they looked like plumes coming out of Shanghai region. More detailed information, using hourly model and weather chart analysis, it was revealed that they were possibly from northern China. It was an interesting case because it might imply that traditional trajectory classifications based on coarse temporal resolution data needed careful interpretation on their source-receptor relation.

***Specific comments:***

***(1) What pollutants does this manuscript study for transport patterns? Satellite images/retrievals can be useful to track certain air pollution phenomena such as sand dust storms and forest fires. The fundamental reason for that is that the origin/source of sand dust and forest fire are obvious plus there is less secondary formation involved (Duncan et al. AE 2014). However it is not appropriate that the authors borrow the same method to analyze the transport of complex anthropogenic emissions and their contributions to regional surface PM concentration, especially if secondary formation are involved.***

Thanks for the comment. Our main focus is the regional scale transport of anthropogenic particulate matters in East Asia. We focused on not only “transport” of pollutant plume but also analyzed how synoptic patterns in this region were associated with “development” and “dissipation” of pollutants.

We do not agree that satellite observations are ineffective to monitor anthropogenic pollutants in East Asia. Simply, strength of anthropogenic pollutants from China is considerably stronger than that by natural particulate matter emissions in North America. Satellite observations have been used to monitor anthropogenic pollutant plumes in East Asia for decades (Guo et al., 2011; Wang et al., 2011). Satellite retrieved NO<sub>2</sub> column densities also had been used to detect anthropogenic emissions in many previous studies (Richter et al., 2005). Satellite retrievals have limitation to separate detailed components of air pollutants, but when combined with model simulations, they have a good synergy to interpret chemical components in the atmosphere.

Guo et al., 2011: Spatio-temporal variation trends of satellite-based aerosol optical depth in China during 1980-2008, doi:[10.1016/j.atmosenv.2011.03.068](https://doi.org/10.1016/j.atmosenv.2011.03.068)

Richter et al., 2005: Increase in tropospheric nitrogen dioxide over China observed from space, doi:10.1038/nature04092

Wang et al., 2011: Verification of anthropogenic emissions of China by satellite and ground observations, doi:[10.1016/j.atmosenv.2011.08.054](https://doi.org/10.1016/j.atmosenv.2011.08.054)

***It is difficult to image that satellite images/retrievals can separate the local and transport contributions to surface PM concentration at a certain receptor location. Without such a separation, how can a transport pattern be determined?***

Thanks for the comment. The main advantage of satellite data is to provide wide coverage. For example, if satellite data show heavy aerosols over the Yellow Sea wherein westerly wind prevails repeatedly, it clearly means that those aerosols are consistently transported from continental sources or formed from the thus transported precursors. Separation of upwind- and downwind- locations of emission sources is commonly used to understand the attribution of pollution source.

***(2) What uncertainties are with the satellite data used here? Air pollution is indexed by surface concentration of air pollutants. None of the satellite image or retrievals are direct observation of surface concentration of air pollutants. Satellite retrievals contain large uncertainties due to all kinds of factors such as cloud, aerosol layer, albedo, terrain etc. The uncertainty of AOD and NO2 column data varies at different time and location. NO2 retrievals are also dependent on what vertical profile used. There is no uncertainty check (or at least there is no QA/QC reported in the manuscript) on the satellite data used here. For example, in Figures 3&4, MODIS AOD has large areas with data missing, but at the same time and location, GOME-2 NO2 has complete valid data available at those areas. Why this happened considering NO2 are more sensitive to cloud and aerosol layers?***

Thanks for the comment. Currently, there are two operational GOME-2 instruments (onboard MetOp-A & MetOp-B satellite) with slightly different coverage, so they are designed to fill each other's coverage gap. Combined coverage from two GOME-2 instruments shows better spatial coverage compared to MODIS. Please, refer to Figure R3 for the daily coverage of GOME-2. For comparison of these satellite images, model simulations are displayed for 12PM local time in figures, but spatial- and temporal- collocation is accurately considered for any numerical evaluation.

MODIS has been operational more than 15 years. MODIS AOD has been intensively evaluated, and believed to be one of most reliable products. We know all satellite products have their own uncertainty, but we do not think MODIS, OMI and GOME-2 have any quality issue susceptible to total rejection. Uncertainty of each product is addressed in the reference paper, and we added more descriptions of each products' data quality in the manuscript.

***(3) What uncertainties are with the modeling results that used to produce the simulated concentration maps? There is no evaluation reported for the model produced surface concentration maps. There are PM10 measurements shown in Figure 9, why don't the authors use these information to evaluate the simulations? Can the authors find more measurements such as at other locations to evaluate the simulations?***

Thanks for the comment. We apologize that we did not include model evaluation results. We have included 19 months evaluation in fine temporal resolution. Please, refer to Figure R1 & R2, or supplementary material.

***The 2006 and 2007 emissions inventory are used for all the 2013-2015 simulations. How accurate the old inventory can be used to represent the more recent years without projection? Especially there was a 2008 worldwide economic recession/decline? And plus there is an air pollution control campaign carried out in China since 2013.***

Thanks for the comment. We have included additional simulations using two sets of emission inventories for Asia and domestic South Korea: (1) INTEX-B 2006 (For Asia) and CAPSS 2007 (South

Korea0, and (2) MICS-Asia 2010 (Asia) and CAPSS 2010 (South Korea). In current study, we illustrate the spatial distribution and transport of pollutants in relation to synoptic meteorology - varying strength of emissions did not result in significant differences. In addition, ironically, NO<sub>x</sub> emissions from China have shown dramatic changes, and NO<sub>x</sub> emission level during the study period was similar to that of early years. Please, refer to Figure R5 for the change of NO<sub>2</sub> column densities from multiple satellites over East Asia. Model evaluation also shows no emission inventory issues.

***(4) In addition, what ratios of PM<sub>2.5</sub>/PM<sub>10</sub> are observed there? This is important information for meaningful analysis.***

Thanks for the comment. We concur that the PM<sub>2.5</sub> to PM<sub>10</sub> mass ratio is a strong indicator for pollutant components. We expanded the discussion on Dec. 31, 2013 case and included analysis on the change of PM<sub>2.5</sub>/PM<sub>10</sub> ratios during the event in the supplementary material.

***(5) Satellite images are once (or twice)-per-day snap shots. Low-pressure system or frontal passage are moving fast, it can clean up all the things within just several hours. The arrival timing of such transport carried by these systems matters. What are the exact timing of the each panel in Figures 3-8? It would be very difficult to derive useful information from daily average maps for a rapid changing process. Satellite images can be taken before or after the arrival of cold front system at certain locations (it would be very rare the images were taken exactly at the arrival time). If it was taken before, the certain locations would be still under the control of the high-pressure system and would be more impacted by the local emissions.***

All instruments used in this study are onboard polar orbital satellites, so they have specific local pass time. Aqua (1:30PM) and Terra (10:30AM) for MODIS, Aura (1:30PM) for OMI, and MetOp-A & MetOp-B (9:30AM) for GOME-2) as mentioned in the manuscript.

Satellites provide snap shots, so we may not determine where the pollutant plume comes from only with satellite image. However, it is very common to use additional information, such as model or weather map, to read flow patterns, then determine its transport pathways. For example, one can establish conceptual relationship between repeated model simulation with pollutant plumes over the Yellow Sea, and satellite's corresponding image of pollution. Both these information sources corroborated that wind direction was westerly or northwesterly. We feel confident to conjecture that pollutants in this case came from western sources since there is no dominant NO<sub>x</sub> emission sources over the ocean.

***(6) Lifetime of NO<sub>x</sub> emissions is short. NO<sub>2</sub> column data are usually used to represent NO<sub>x</sub> emissions (i.e. local emissions, not transported precursors). The association of NO<sub>2</sub> column and AOD data are in fact showing the local contribution of anthropogenic emissions to PM concentrations instead of that being transported downstream by fast moving low-pressure system.***

Thanks for the comment. For the NO<sub>2</sub> plume extended from mainland China (Figure 6 in the manuscript), there is no significant NO<sub>x</sub> emission sources over the Yellow Sea except emissions from traveling ships. Considering prominent northwesterly wind direction, it is fairly reasonable that this plume is transported and extended from sources in China.

***(7) What mechanism can bring the lifted transported pollutants down to the surface with a fast moving low-pressure system? Are there different mechanisms working for different pollutants: dust, PM<sub>10</sub>, PM<sub>2.5</sub> and other precursor pollutants? Column data doesn't differentiate surface density from the density above. How do the authors relate lifting transport to surface concentrations?***

Thanks for the comment. Lifting mechanism associated with cold frontal passage does not mean simple upward movement of a solid object. It is associated with complicated upward motion in warm side and strong downward motion in cold side. It is also associated lateral detrainment at many levels. Please,

refer to Figure R5 (or meteorology text book) for the structure of cold frontal passages and air flows. We cannot simply argue that all the pollutants are lifted up by cold front and have nothing with surface concentration.

There is no conclusive studies to explain how high these anthropogenic plumes travel over the Yellow Sea. This may be different from the case of Asian Dust which cannot travel long-range unless it is fully aloft. At least, model simulation shows enhanced particulate matter plumes extending from the surface up to (and above) boundary layer, being pushed by the cold front. In fact, the uplifting capability of cold front is an interesting topic, but it is out of current study's scope since we do not have in-situ observations in current study period. We will pursue it later with campaign data over the Yellow Sea – e.g. KORUS-AQ.

*(8) Transport patterns need to separate local contributions and those being transported, if unable to do so, how satellite images can help to identify any transport patterns? Models with appropriate tools can help, but in that case, first, modeling results of air pollutant concentrations should be extensively evaluated, inventory should be updated and modeled meteorology should be evaluated too.*

Thanks for the comment. This comment is exactly what we like to demonstrate in this study. Most of satellite observations are short term snap shots, and do not provide much information when used alone. However, when remote-sensed information is combined with chemistry transport model and synoptic weather analysis, they have very strong synergy and can provide better understanding. We apologize for the lack of model evaluation for the initial manuscript. As reviewer commented we have included detailed model performance evaluations to confirm the good performance of current model used in this study.

### Conclusive remarks

We again appreciate reviewers' comments. We think that most of reviewers' comments are helpful and relevant. We tried our best to cover most of the points addressed by reviewers, and, at the same time, we tried to keep the scope of this study clear and concise. Additional analysis are or will be available in following studies.

1. Quantitative estimation of contributions from regional pollutants and precursors (Kim et al., 2017a)
2. Formation of secondary aerosol (Kim et al., 2017b)
3. Long-term correlation of regional weather and pollution (Kim et al., 2017c)

Kim, E., C. Bae, **H. C. Kim**, J. H. Cho, B.-U. Kim, and S. Kim, 2017a: Regional Contributions to Particulate Matter Concentration in the Seoul Metropolitan Area, Korea: Seasonal Variation and Sensitivity to Meteorology and Emissions Inventory, *Atmospheric Chemistry and Physics Discussion*, doi:10.5194/acp-2016-1114

Kim, B.-U., C. Bae, **H. C. Kim**, E. Kim, and S. Kim, 2017b: Spatially and Chemically Resolved Source Apportionment Analysis: Case Study of High Particulate Matter Event in the Seoul Metropolitan Area, South Korea, during late February 2014, *under review*

**Kim, H. C.**, S. Kim, B.-U. Kim, C.-S. Jin, R. Park, C. Bae, M. Bae, and A. Stein, 2017c: Recent increase of surface particulate matter concentrations in the Seoul Metropolitan Area, Korea, *under review*

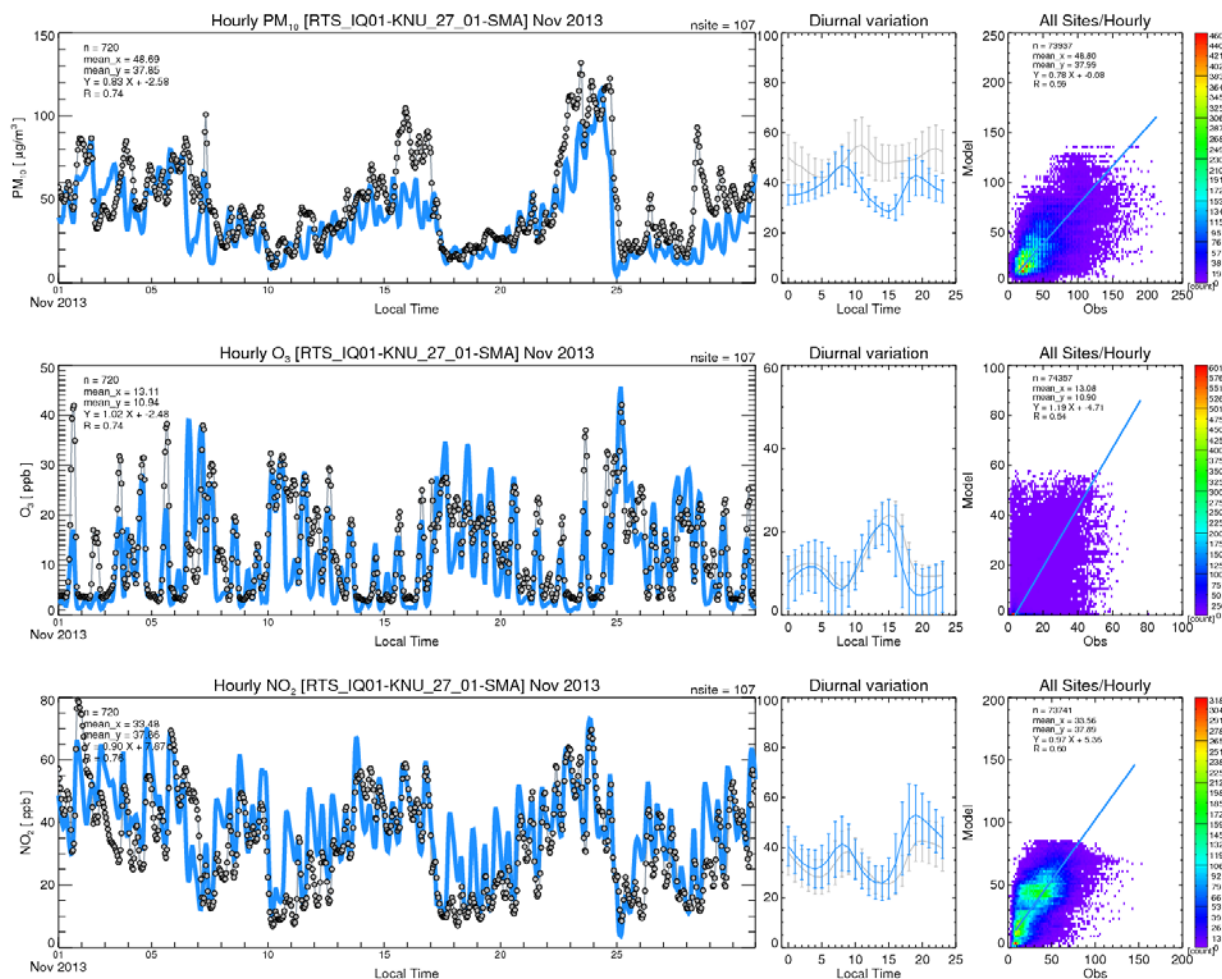

**Figure R1** Time series of surface  $PM_{10}$ ,  $O_3$  and  $NO_2$  concentrations from model and surface monitoring sites during November 2013 over the Seoul, Korea. Observations from 107 sites are compared. Simulation is conducted using the INTEX-B 2006 emission inventory over Asia and CAPSS 2007 over South Korea. Additional comparisons are provided in the supplemental materials.

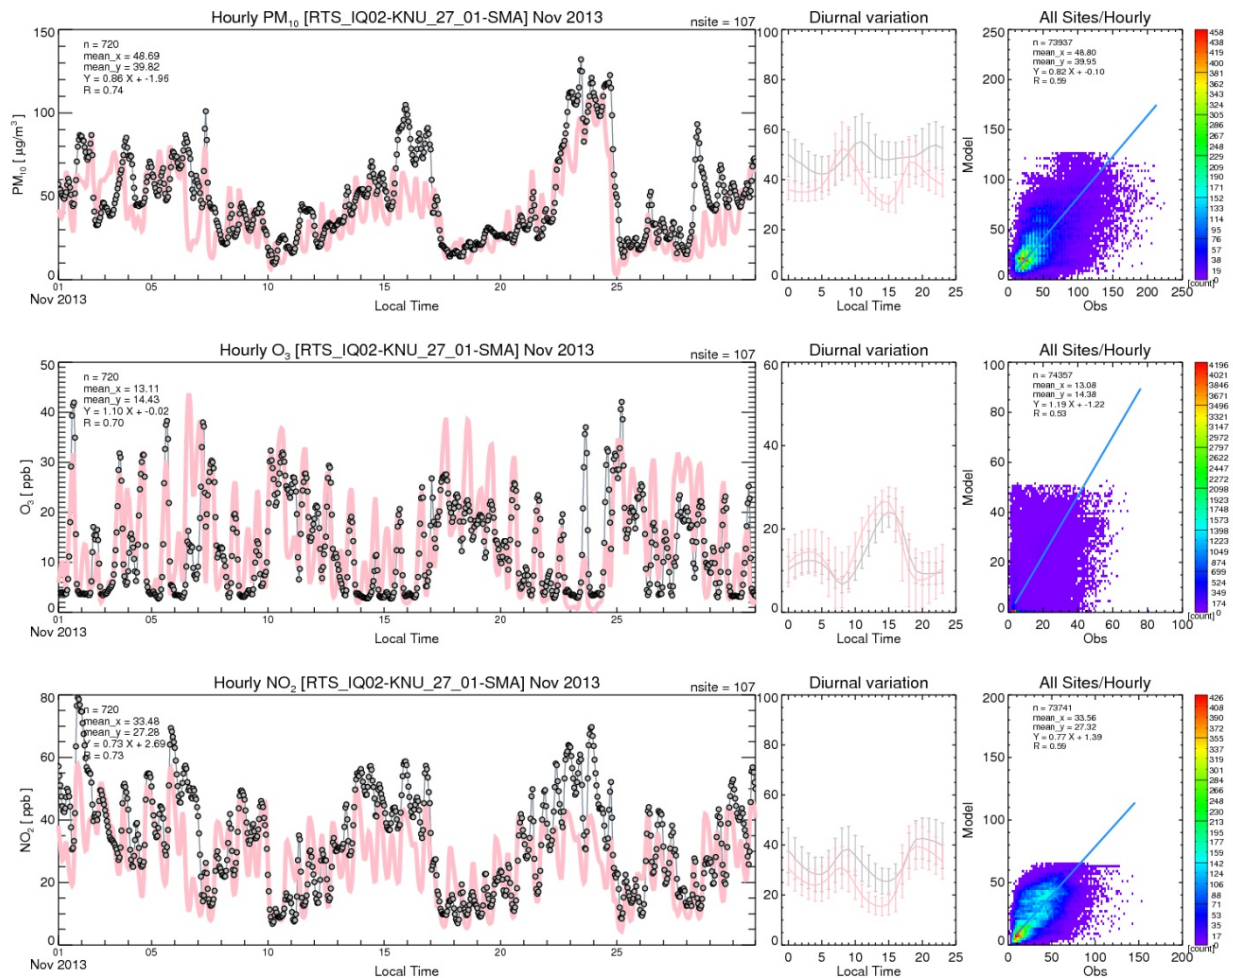

Figure R2 Same with Figure R1 except emission inventories from MICS-2010 and CAPSS 2010.



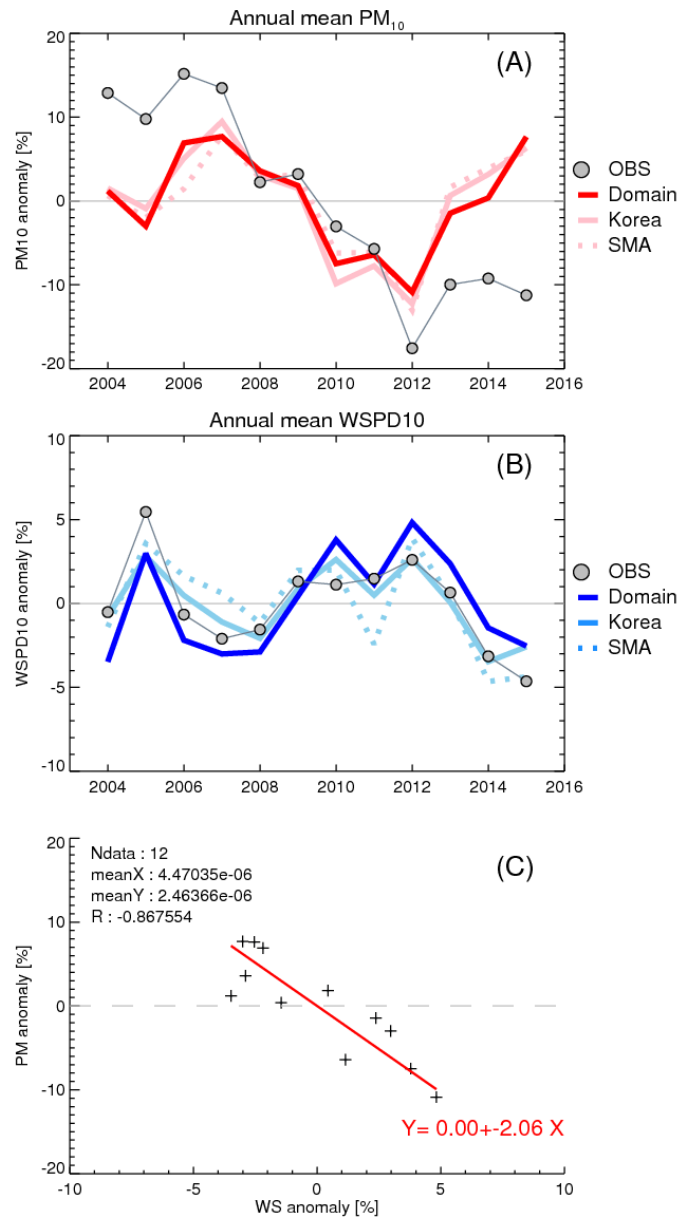

**Figure R3.** Normalized anomalies of annual mean surface PM concentration (a), and annual mean 10-m wind speed (b). Red (blue), pink (light blue), and dashed pink (light blue) lines indicate anomalies of modeled PM concentrations averaged over the 9-km domain-wide, Korea (land pixels), and the SMA regions for PM concentrations (for wind speed). Circles indicate observations of surface PM concentrations (257 sites over South Korea) and wind speed (79 sites over South Korea). The scatter plot (c) shows a least square regression fit between normalized anomalies of surface PM concentrations and wind speed from the model (9-km domain average). (Kim et al., 2017c)

GOME2 (METOP-A) tropospheric NO<sub>2</sub> 04 Nov 2013

KNMI/IASB/EUMETSAT

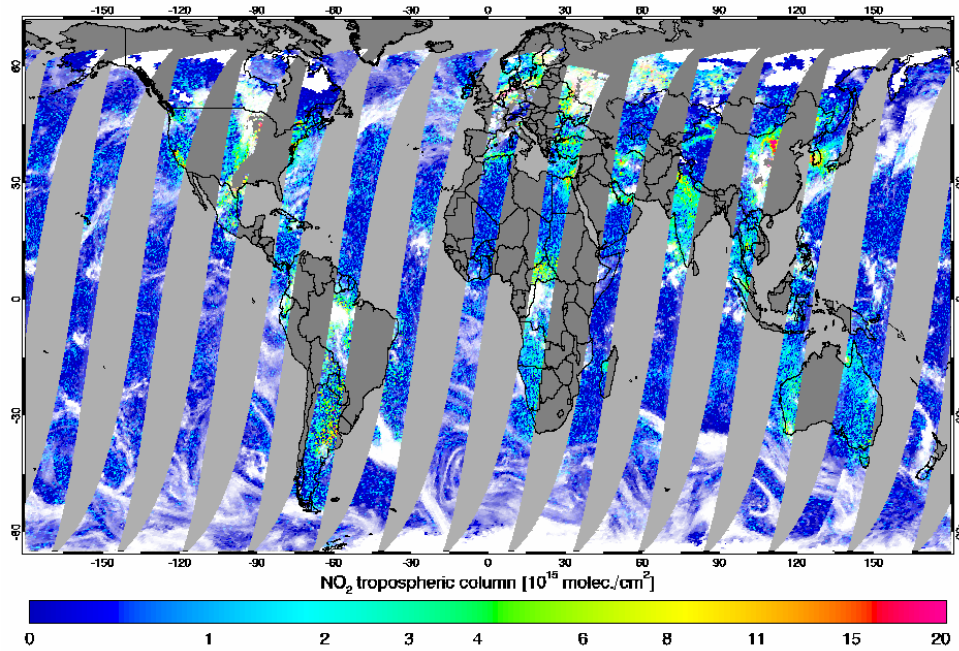

GOME2 (METOP-B) tropospheric NO<sub>2</sub> 04 Nov 2013

KNMI/IASB/EUMETSAT

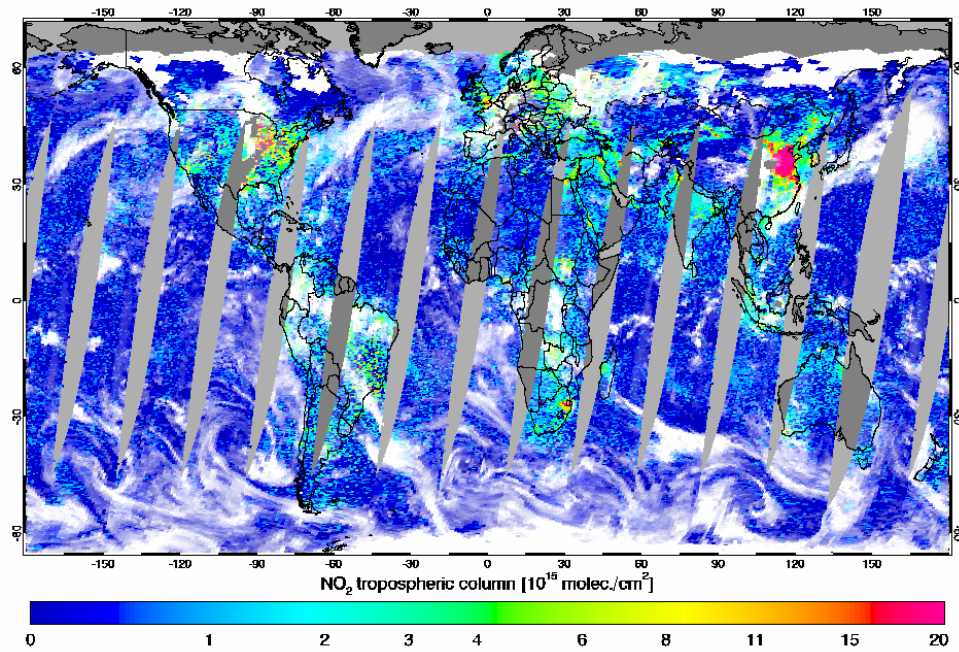

Figure R4 Spatial coverage of GOME-2 onboard MetOp-A (upper) and MetOp-B (lower).

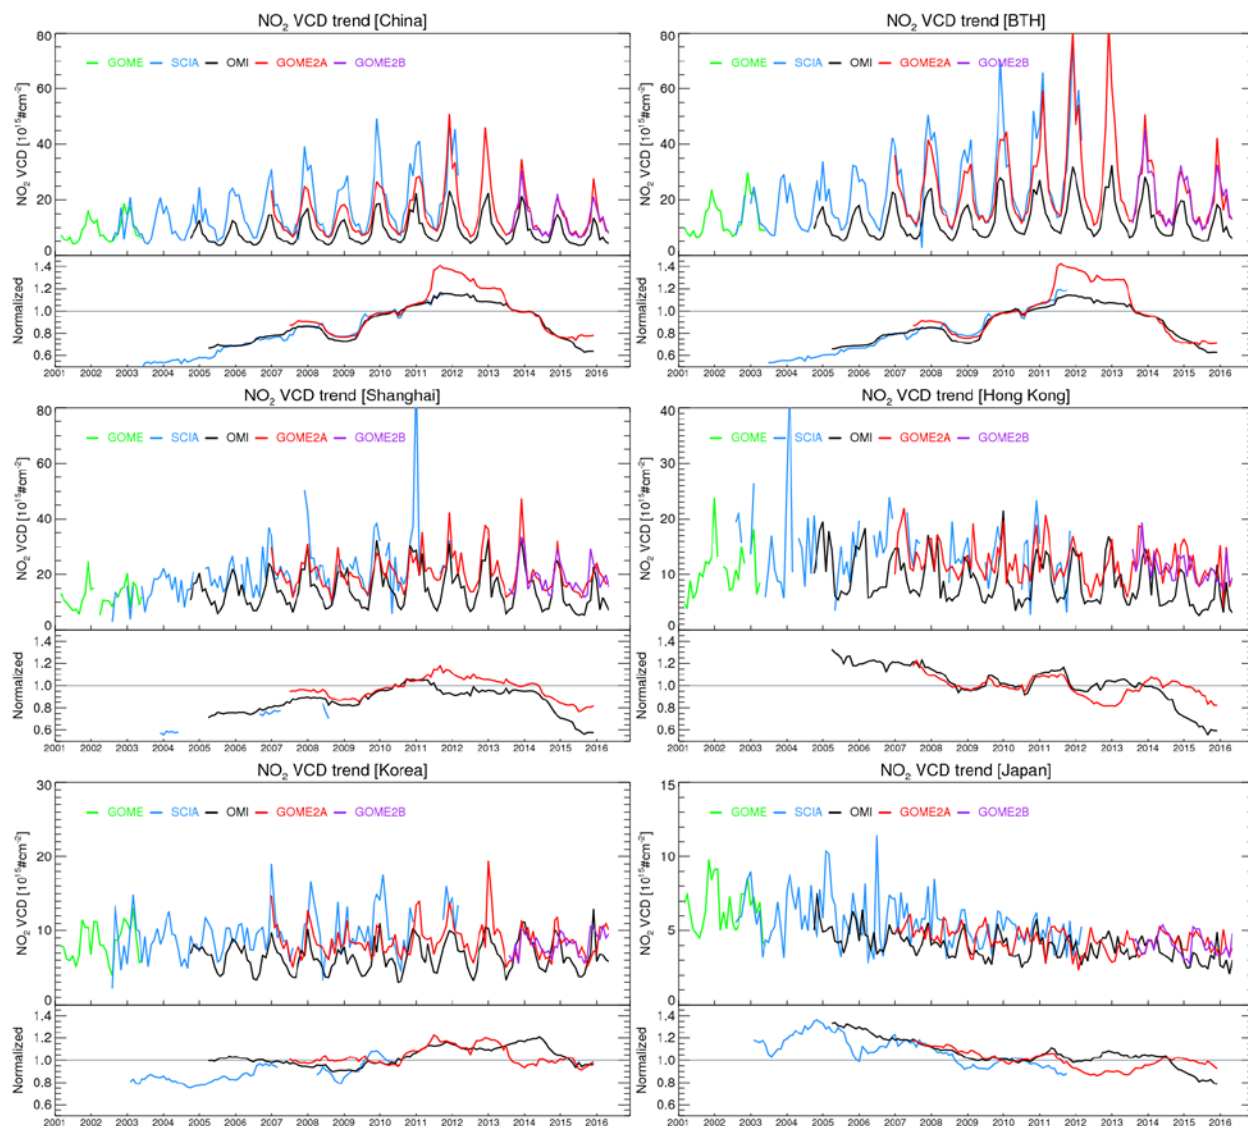

**Figure R5** Time series of GOME, SCIAMACHY, OMI, and GOME-2 NO<sub>2</sub> VCD for (a) China, (b) the BTH region, (c) Shanghai, (d) Hong Kong, (e) Korea, and (f) Japan. NO<sub>2</sub> VCD is shown in the upper panels, and 12-month moving averages, normalized to the 2010 mean, are shown in the lower panels. (Kim et al. 2016, under review)

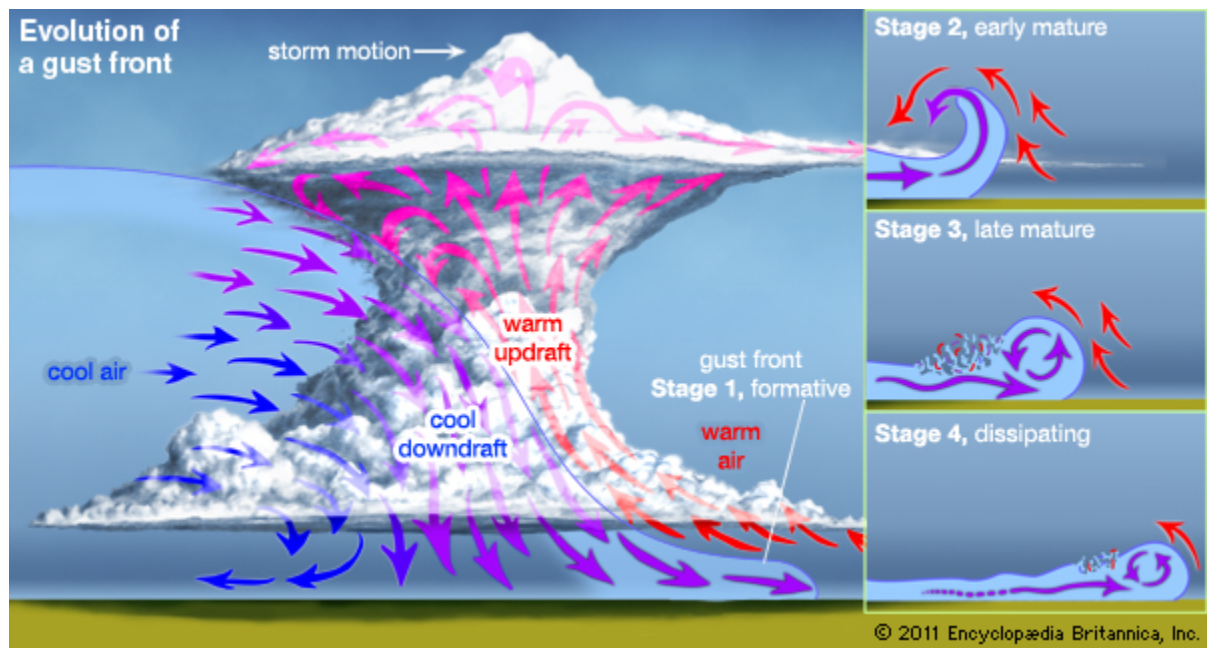

**Figure R6** <https://www.britannica.com/science/thunderstorm/images-videos/Evolution-of-a-gust-front-During-a-thunderstorm-a-large/19393>
